# Supplementary material for: The Salt-Stress Response of the Transgenic Plum Line J8-1 and Its Interaction with the Salicylic Acid Biosynthetic Pathway from Mandelonitrile
Source: MDPI journal article supplement (doi:10.3390/ijms19113519), 2018-11-08
Supplement: s1 [file s1]

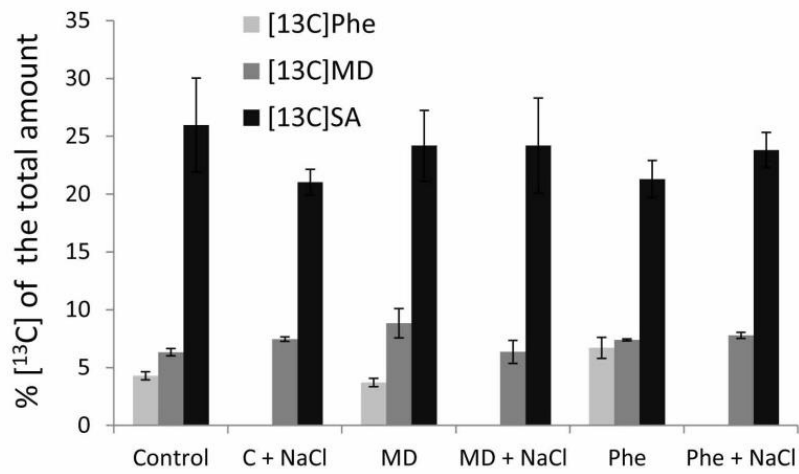

**Sup. Figure 1.** The % of  $[^{13}\text{C}]\text{Phe}$ ,  $[^{13}\text{C}]\text{MD}$  and  $[^{13}\text{C}]\text{SA}$  of the total amount detected in J8-1 micropropagated shoots.

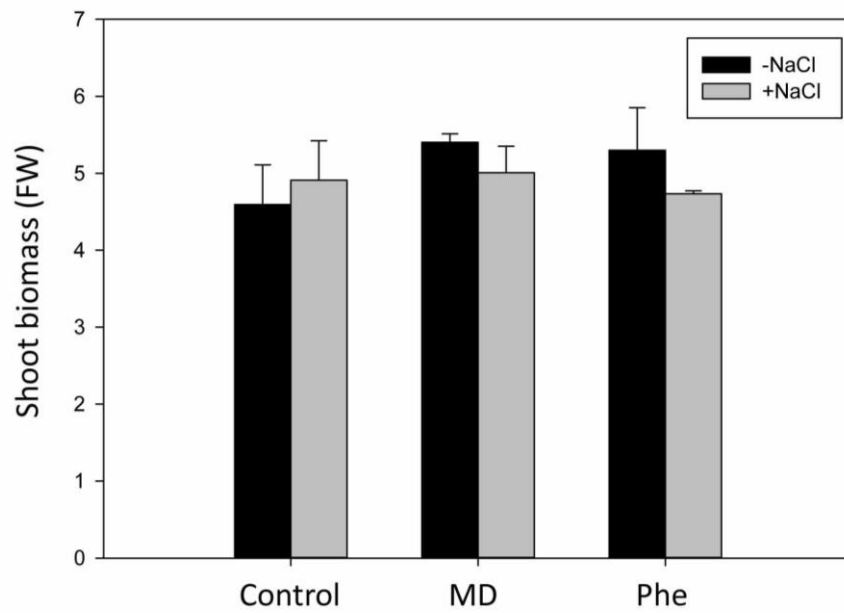

**Sup. Figure 2.** Effect of NaCl on the shoot biomass of control, MD and Phe treated J8-1 plum seedlings. Data represents the mean  $\pm$  SE of at least ten repetitions. No statistical differences were observed according to Duncan's test ( $p < 0.05$ ).

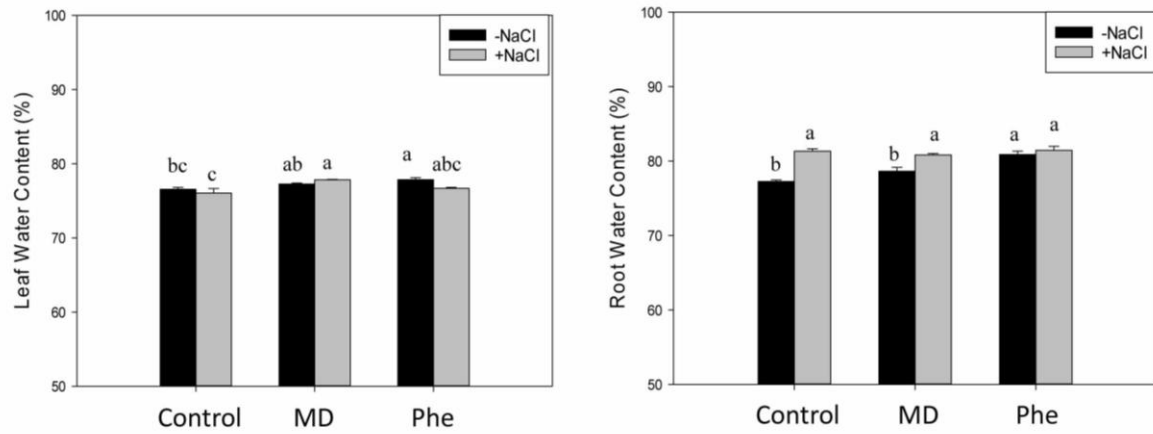

**Sup. Figure 3.** Effect of NaCl on the water content in the leaves and roots of control and MD- and Phe-treated J8-1 seedlings. Data represents the mean  $\pm$  SE of at least four repetitions. Different letters indicate statistical significance according to Duncan's test ( $p < 0.05$ ).
